# Supplementary material for: On-purpose design of dual active sites in single V atom anchored C2N nanosheets for propane dehydrogenation catalysis
Source: Royal Society of Chemistry journal article supplement (doi:10.1039/d2qi01463g), 2022-01-01
Supplement: d2qi01463g1.pdf [file d2qi01463g1.pdf]

*Electronic supplementary information (ESI)*

**On-purpose design of dual active sites in single V atom anchored C<sub>2</sub>N  
nanosheet for propane dehydrogenation catalysis**

Yingke Yang, ‡<sup>a,b</sup> Jiawen Wang, ‡<sup>b,c</sup> Haiping Lin,<sup>d</sup> Huilong Dong,<sup>\*a</sup> Youyong Li<sup>\*b,c</sup>

a. School of Materials Engineering, Changshu Institute of Technology, Changshu, Jiangsu 215500, China. Email: huilong\_dong@126.com

b. Institute of Functional Nano & Soft Materials (FUNSOM), Soochow University, Suzhou, Jiangsu 215123, China. Email: yyli@suda.edu.cn

c. Macao Institute of Materials Science and Engineering, Macau University of Science and Technology, Taipa, Macau SAR 999078, China

d. School of Physics and Information Technology, Shaanxi Normal University, Xi'an, Shaanxi 710119, China

‡ These authors contributed equally to this work.

**Table S1.** Adsorption energies of single TM atoms on C<sub>2</sub>N.

| TM | E <sub>ads</sub> (H1)<br>(eV) | E <sub>ads</sub> (H2)<br>(eV) | E <sub>ads</sub> (H3)<br>(eV) | E <sub>ads</sub> (B1)<br>(eV) | E <sub>ads</sub> (B2)<br>(eV) | E <sub>ads</sub> (h1)<br>(eV) | E <sub>ads</sub> (h2)<br>(eV) | E <sub>cohe</sub> <sup>a</sup><br>(eV) |
|----|-------------------------------|-------------------------------|-------------------------------|-------------------------------|-------------------------------|-------------------------------|-------------------------------|----------------------------------------|
| Sc | -7.54                         | -7.54                         |                               |                               |                               | -3.56                         | -1.79                         | -3.9                                   |
| Ti | -6.77                         | -6.75                         |                               |                               |                               | -3.61                         | -2.05                         | -4.85                                  |
| V  | -6.04                         |                               |                               |                               | -1.21                         | -2.62                         | -1.50                         | -5.31                                  |
| Cr | -7.93                         | -7.92                         | -7.45                         |                               |                               | -3.73                         | -4.01                         | -4.1                                   |
| Mn | -4.46                         | -4.44                         | -4.22                         |                               | -0.47                         | -0.50                         | -0.45                         | -2.92                                  |
| Fe | -4.57                         |                               |                               |                               |                               | -1.50                         | -1.05                         | -4.28                                  |
| Co | -4.52                         |                               |                               |                               |                               | -1.67                         | -1.57                         | -4.39                                  |
| Ni | -4.94                         |                               |                               |                               |                               | -1.84                         | -2.21                         | -4.44                                  |
| Cu | -3.38                         |                               |                               | -0.59                         | -0.55                         | -0.35                         | -0.50                         | -3.49                                  |
| Zn | -1.46                         |                               |                               | -0.14                         | -0.14                         | -0.15                         | -0.16                         | -1.35                                  |

<sup>a</sup> Cohesion energy**Table S2.** Adsorption energies of single and double TM atoms on C<sub>2</sub>N.

| TM | E <sub>ads</sub> (TM1)<br>(eV) | E <sub>ads</sub> (TM2)<br>(eV) | ΔE* (eV) | TM | E <sub>ads</sub> (TM1)<br>(eV) | E <sub>ads</sub> (TM2)<br>(eV) | ΔE* (eV) <sup>a</sup> |
|----|--------------------------------|--------------------------------|----------|----|--------------------------------|--------------------------------|-----------------------|
| Sc | -7.54                          | -3.66                          | 3.88     | Fe | -4.57                          | -3.86                          | 0.71                  |
| Ti | -6.77                          | -5.02                          | 1.75     | Co | -4.52                          | -4.47                          | 0.05                  |
| V  | -6.04                          | -4.35                          | 1.70     | Ni | -4.94                          | -4.30                          | 0.64                  |
| Cr | -7.93                          | -5.87                          | 2.06     | Cu | -3.38                          | -2.66                          | 0.72                  |
| Mn | -4.46                          | -1.01                          | 3.45     | Zn | -1.46                          | -1.94                          | -0.48                 |

$$^a \Delta E^* = E_{ads}(TM2) - E_{ads}(TM1)$$

**Table S3.** Summary of possible elementary reactions in PDH.

| Reaction No. | Elementary Reaction                                                                                                  |
|--------------|----------------------------------------------------------------------------------------------------------------------|
| 1            | $\text{CH}_3\text{CH}_2\text{CH}_3^* \rightarrow \text{CH}_3\text{CH}_2\text{CH}_2^* + \text{H}^*$                   |
| 2            | $\text{CH}_3\text{CH}_2\text{CH}_3^* \rightarrow \text{CH}_3\text{CHCH}_3^* + \text{H}^*$                            |
| 3            | $\text{CH}_3\text{CH}_2\text{CH}_2^* + \text{H}^* \rightarrow \text{CH}_3\text{CH}_2\text{CH}^* + 2\text{H}^*$       |
| 4            | $\text{CH}_3\text{CH}_2\text{CH}_2^* + \text{H}^* \rightarrow \text{CH}_3\text{CH}=\text{CH}_2^* + \text{H}_2$       |
| 5            | $\text{CH}_3\text{CHCH}_3^* + \text{H}^* \rightarrow \text{CH}_3\text{CH}=\text{CH}_2^* + \text{H}_2$                |
| 6            | $\text{CH}_3\text{CHCH}_3^* + \text{H}^* \rightarrow \text{CH}_3\text{CCH}_3^* + 2\text{H}^*$                        |
| 7            | $\text{CH}_3\text{CH}=\text{CH}_2^* \rightarrow \text{CH}_3\text{CH}=\text{CH}^* + \text{H}^*$                       |
| 8            | $\text{CH}_3\text{CH}=\text{CH}_2^* \rightarrow \text{CH}_3\text{C}=\text{CH}_2^* + \text{H}^*$                      |
| 9            | $\text{CH}_3\text{CH}_2\text{CH}_3^* \rightarrow \text{CH}_3^* + \text{CHCH}_3^*$                                    |
| 10           | $\text{CH}_3\text{CH}_2\text{CH}_2^* + \text{H}^* \rightarrow \text{CH}_3\text{CH}_2^* + \text{CH}_2^* + \text{H}^*$ |
| 11           | $\text{CH}_3\text{CHCH}_3^* + \text{H}^* \rightarrow \text{CH}_3\text{CH}^* + \text{CH}_3^* + \text{H}^*$            |
| 12           | $\text{CH}_3\text{CH}=\text{CH}_2^* \rightarrow \text{CH}_3\text{CH} + \text{CH}_2^*$                                |

**Table S4.** The reaction energies of the first and second dehydrogenations of propane on  $\text{TM}_1/\text{C}_2\text{N}$ .

| $\text{TM}_1/\text{C}_2\text{N}$ | $\text{C}_3\text{H}_8^*$<br>$E_{\text{ads}}^*(\text{eV})$ | $\text{C}_3\text{H}_7^*(\text{TM}) + \text{H}^*(\text{N})$<br>$\Delta E$ (eV) | $E_b$ (eV) | $\text{C}_3\text{H}_6^*(\text{TM}) + 2\text{H}^*(\text{N})$<br>$\Delta E$ (eV) | $E_b$ (eV) |
|----------------------------------|-----------------------------------------------------------|-------------------------------------------------------------------------------|------------|--------------------------------------------------------------------------------|------------|
| $\text{Sc}_1/\text{C}_2\text{N}$ | -0.65                                                     | 0.56                                                                          | 1.00       | 0.57                                                                           | 1.58       |
| $\text{Ti}_1/\text{C}_2\text{N}$ | -0.86                                                     | 0.28                                                                          | 0.97       | 0.53                                                                           | 0.86       |
| $\text{V}_1/\text{C}_2\text{N}$  | -0.39                                                     | 0.10                                                                          | 1.12       | 0.31                                                                           | 0.91       |
| $\text{Cr}_1/\text{C}_2\text{N}$ | -0.34                                                     | 0.30                                                                          | 1.38       | 0.26                                                                           | 1.08       |
| $\text{Mn}_1/\text{C}_2\text{N}$ | -0.47                                                     | 0.36                                                                          | 1.71       | 0.19                                                                           | 1.27       |

**Table S5.** The activation barriers ( $E_b$ ) and reaction energies ( $E_{r1}$ ) of dehydrogenation, the energies required for propylene desorption ( $E_{r2}$ ) on  $\text{TM}_1/\text{C}_2\text{N}$ , as well as the energy difference between dehydrogenation and desorption process of propylene ( $\Delta E = E_b - E_{r2}$ ).

| $\text{TM}_1/\text{C}_2\text{N}$ | $\text{C}_3\text{H}_6^* \rightarrow \text{C}_3\text{H}_5^*(\text{TM}) + \text{H}^*(\text{N})$<br>$E_b$ (eV) | $E_{r1}$ (eV) | $\text{C}_3\text{H}_6^* \rightarrow \text{C}_3\text{H}_6(\text{g})^+*$<br>$E_{r2}$ (eV) | $\Delta E$ (eV) |
|----------------------------------|-------------------------------------------------------------------------------------------------------------|---------------|-----------------------------------------------------------------------------------------|-----------------|
| $\text{Sc}_1/\text{C}_2\text{N}$ | 1.25                                                                                                        | 0.97          | 1.42                                                                                    | -0.17           |
| $\text{Ti}_1/\text{C}_2\text{N}$ | 1.38                                                                                                        | 1.03          | 1.43                                                                                    | -0.05           |
| $\text{V}_1/\text{C}_2\text{N}$  | 1.53                                                                                                        | 1.06          | 1.10                                                                                    | +0.43           |
| $\text{Cr}_1/\text{C}_2\text{N}$ | 1.97                                                                                                        | 0.68          | 1.07                                                                                    | +0.90           |
| $\text{Mn}_1/\text{C}_2\text{N}$ | 1.83                                                                                                        | 0.83          | 1.32                                                                                    | +0.51           |

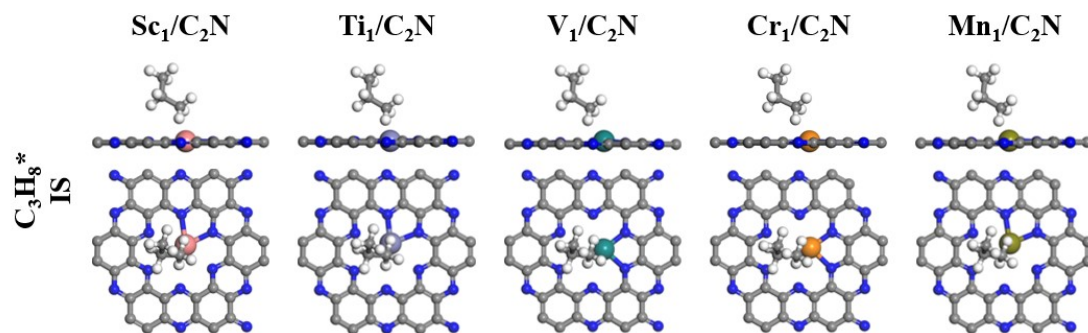

**Fig. S1** Adsorption configurations of propane on TM<sub>1</sub>/C<sub>2</sub>N.

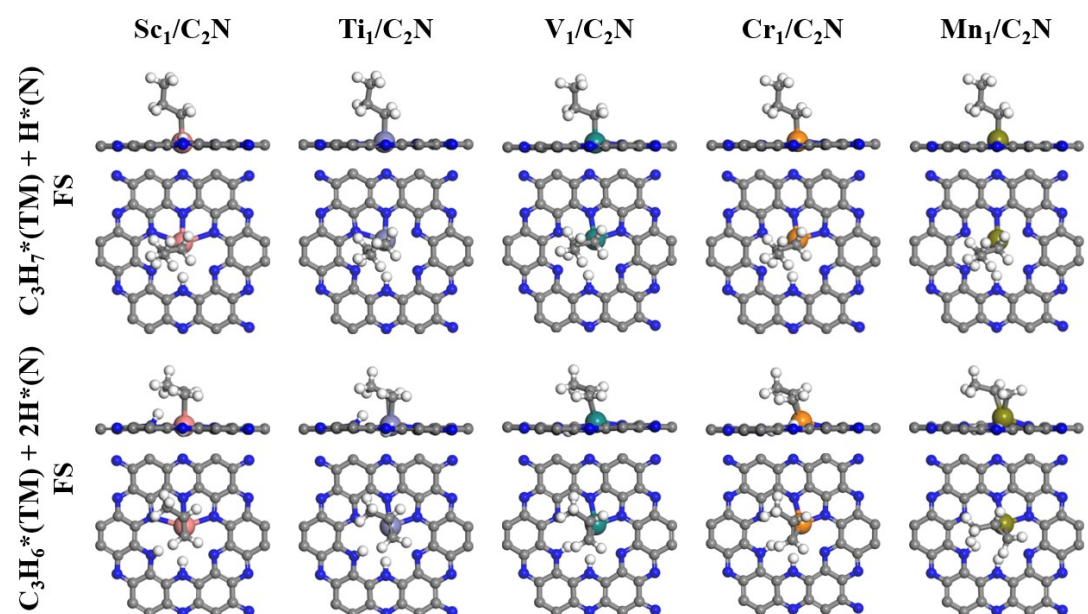

**Fig. S2** Adsorption configurations of propyl, propylene and dissociated H atoms in the first and second dehydrogenations of propane on TM<sub>1</sub>/C<sub>2</sub>N.

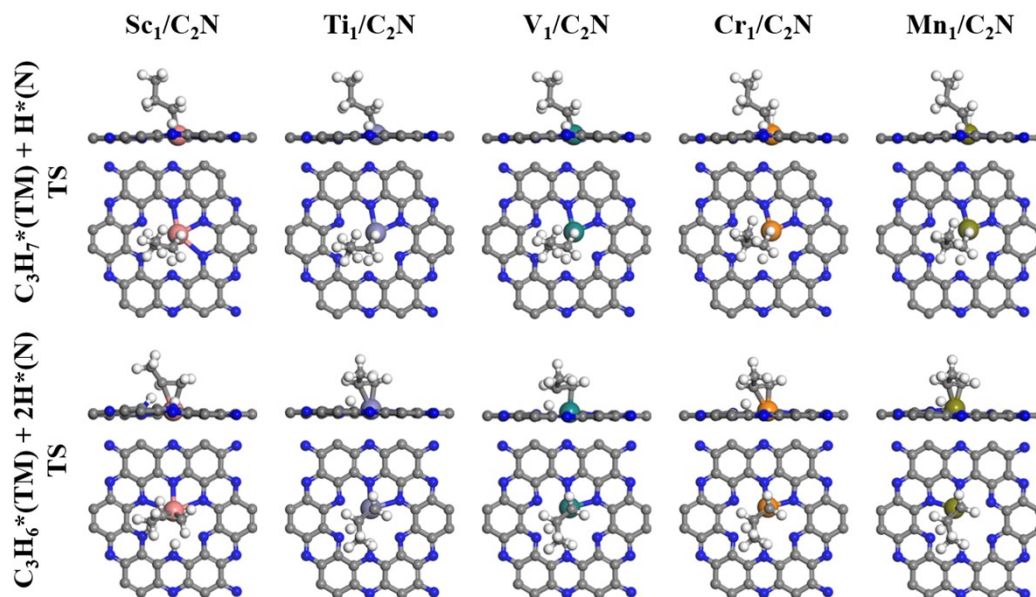

**Fig. S3** Transition states of the first and second dehydrogenations of propane on  $\text{TM}_1/\text{C}_2\text{N}$ .

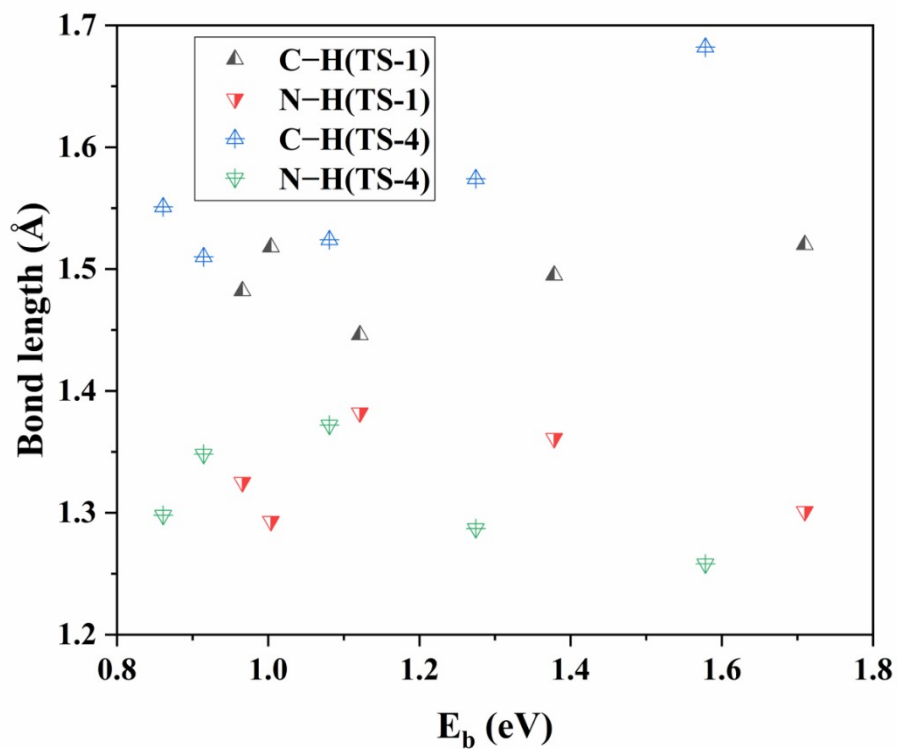

**Fig. S4** Correspondence between the energy barrier and bond length of TS-1 and TS-4 on  $\text{TM}_1/\text{C}_2\text{N}$ .

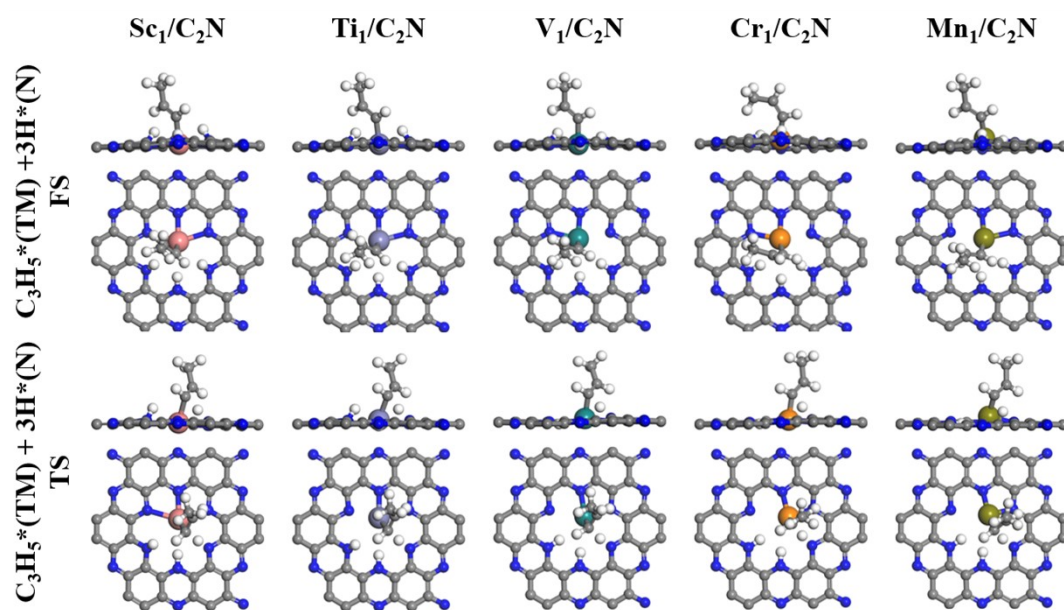

Fig. S5 Final states and transition states of propylene dehydrogenation on TM<sub>1</sub>/C<sub>2</sub>N.

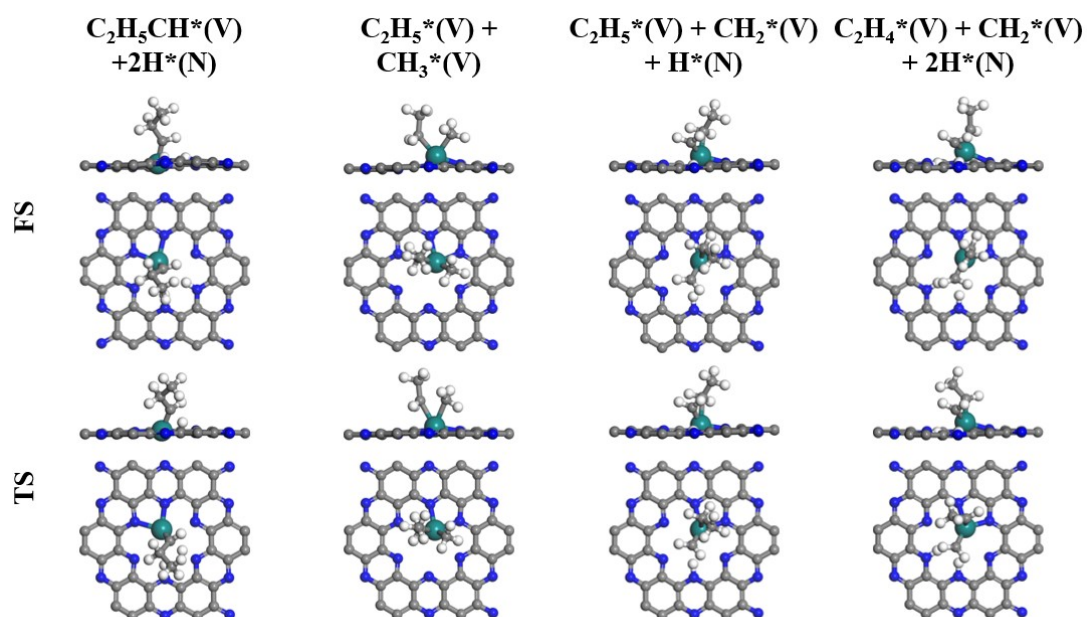

Fig. S6 Final states and transition states of over-dehydrogenation and C–C bond cracking of C<sub>3</sub> species on V<sub>1</sub>/C<sub>2</sub>N.
